# Supplementary material
Source: Springer Nature journal article supplement (https://www.springermedizin.de/resource/supplementary/12885_2008_1446_MOESM2_ESM.pdf/9472034)

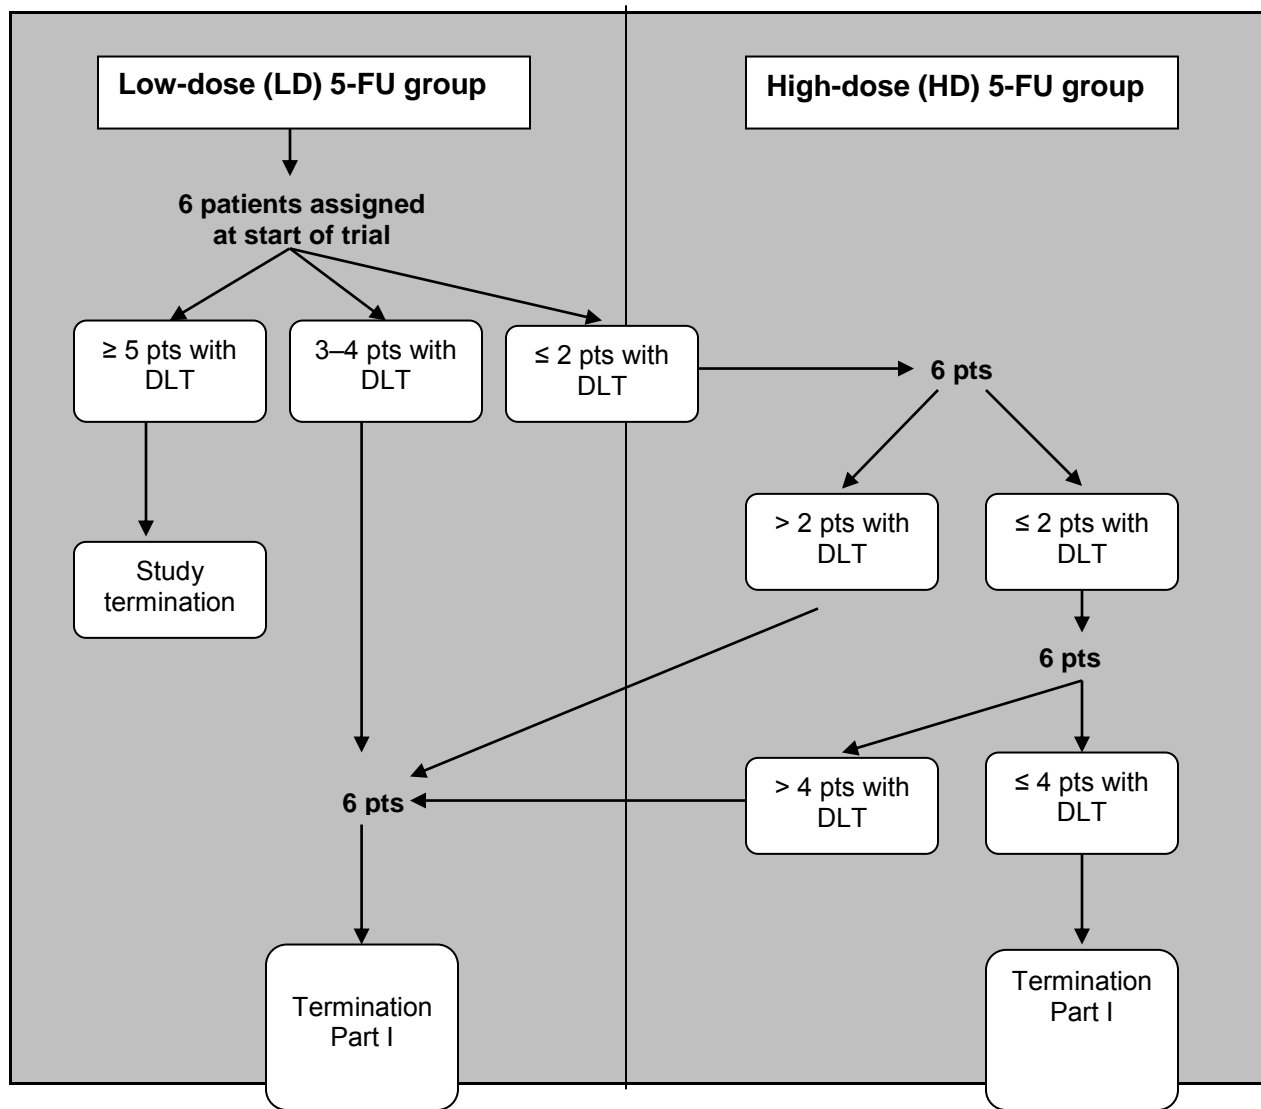

pts, patients; DLT, dose-limiting toxicity

Supplement: MOESM2 [file 9472034]
